# Supplementary material
Source: publisher figshare collection journal article supplement (https://springernature.figshare.com/ndownloader/files/17280899)
Supplement: Supplementary file [file 17280899]

# Looking for research participants!

## Why are we doing this study?

- Canadians spend over 90% of their time indoors.
- Indoor air quality is crucial for our health, more so for our children
- The study aims to explore your perception about indoor radon gas that will help support policy

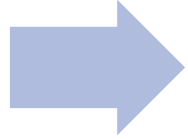

## Who can participate in this study?

- Homeowners and tenants from Ottawa-Gatineau and neighborhoods
- Living in a house for at least one year that has a used basement or living space on the ground floor

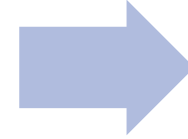

## How, where and when?

- Face to face interview
- At your preferred place and time

## What do you do?

Participate in an interview that takes about 45-60 minutes

## How to join the study?

Call to: xxx or email: [skhan196@uottawa.ca](mailto:skhan196@uottawa.ca)

## What will I get?

- Acquire knowledge about indoor air quality, risks and solutions
- Satisfaction from contribution to knowledge generation
- A free test kit is available to voluntarily test your house for radon
